# Supplementary material for: Epigenetic Modifications Induced by Olive Oil and Its Phenolic Compounds: A Systematic Review
Source: MDPI journal article supplement (doi:10.3390/molecules26020273), 2021-01-07
Supplement: s1 [file s1]

**Table 1S.** Characteristics of selected studies showing the effects of olive oil and/or its phenolic compounds on miRNAs (expression)

| Reference                   | Compound (Dose)                                                                                                                      | Model                                                                                         | Epigenetic Effects                                                                                                                                                                                                     | Other effects (Health related effects)                                                                                                                                                                             |
|-----------------------------|--------------------------------------------------------------------------------------------------------------------------------------|-----------------------------------------------------------------------------------------------|------------------------------------------------------------------------------------------------------------------------------------------------------------------------------------------------------------------------|--------------------------------------------------------------------------------------------------------------------------------------------------------------------------------------------------------------------|
| Tunca, 2012 [21]            | <i>Olea europaea</i> leaf extract: OLE (5-2000 µg/ml, 15% oleuropein)<br><br>Tested the effects in combination with TMZ <sup>1</sup> | In vitro:<br>-T98G human GBM <sup>2</sup> cell line                                           | 40 miRNAs were screened<br>OLE:<br>↑ miRNA-584, miRNA-210, miRNA-219-1-3b, miRNA-181b, miRNA-145, miRNA-137<br>↓ miRNA-24<br>=miRNA-153, let-7d<br>OLE + TMZ:<br>↑ miRNA-181b, miRNA-153, miRNA-145, miRNA-137, let-7d | ↓ Proliferation<br>Synergistic effect with TMZ<br><br><b>(Anti-cancer)</b>                                                                                                                                         |
| Tezcan, 2014 [22]           | <i>Olea europaea</i> leaf extract: OLE (5-2000 µg/ml, 15% oleuropein)<br><br>Tested the effects in combination with TMZ              | In vitro:<br>-T98G, U-138MG and U-187MG human GBM cell lines<br>-GBM stem-like cells (GSCs)   | OLE in GSCs<br>↑ miRNA-153, miRNA-137<br>=miRNA-181b, miRNA-145, Let-7d<br>OLE + TMZ in GSCs:<br>↑ miRNA-153, miRNA-137, miRNA-181b, miRNA-145, =Let-7d                                                                | ↓ Proliferation (U-138MG and U-187MG)<br>↑ Apoptosis (T98G, U-138MG and U-187MG)<br>↓ mRNA of: <i>TP53</i> , <i>OCT-4</i> , <i>SOX2</i> , <i>BCL2</i> , <i>c-myc</i> , <i>c-Met</i> (GSCs)<br><b>(Anti-cancer)</b> |
| Casas-Agustench, 2015, [23] | Olive oil as a source of n-9 fatty acids                                                                                             | In vivo:<br>-Female Sprague-Dawley rats                                                       | ↑ miRNA-215, miRNA-10b, miRNA-26, miRNA-377-3p, miRNA-21, miRNA-192                                                                                                                                                    | No effect on 88 genes related to insulin signaling<br><b>(Insulin sensitivity)</b>                                                                                                                                 |
| Di Francesco, 2015 [60]     | -EVOO <sup>3</sup><br>(In vitro: 100 ppm containing 320 mg of total phenols/kg)<br>(In vivo: gavage, 250 µl/300 g)                   | In vitro:<br>-CaCo-2 human colorectal cancer cells<br>In vivo:<br>-Female Sprague-Dawley rats | In vivo:<br>↓ miRNA-23, miRNA-301a<br>=miRNA-27a, miRNA-29a                                                                                                                                                            | ↑ CB1 <sup>4</sup> (protein)<br>↑ mRNA of: <i>CNR1</i><br>↓ Proliferation (Caco-2 cells)<br><b>(Anti-cancer)</b>                                                                                                   |

|                          |                                                                                                                               |                                                                                                                                                                |                                                                                                                                                                                                                                                                                                     |                                                                                                                                                                                                                                                                       |
|--------------------------|-------------------------------------------------------------------------------------------------------------------------------|----------------------------------------------------------------------------------------------------------------------------------------------------------------|-----------------------------------------------------------------------------------------------------------------------------------------------------------------------------------------------------------------------------------------------------------------------------------------------------|-----------------------------------------------------------------------------------------------------------------------------------------------------------------------------------------------------------------------------------------------------------------------|
| Tomé-Carneiro, 2016 [24] | Hydroxytyrosol (HT)<br>(0.03 % HT in diet, long term)<br>(Gavage, 15mg of HT, acute)<br>(in vitro: 10 µM)<br>(Human: 25 mg/d) | In vitro:<br>-CaCo-2, InEpCells <sup>5</sup> , mouse primary intestinal organoids or “miniguts”<br>In vivo:<br>-C57BL/6mice (8 weeks)<br>Human trial:<br>-PBMC | In vitro:<br>CaCo2: ↓ miRNA-196b-3p<br>InEpCells: ↑ miRNA-483-3p, miRNA-1247-5p<br>Miniguts: ↑ miRNA-193a-5p, miRNA-1247-5p<br>In vivo: 752 miRNAs screened<br>↑ miRNA-483-3p, miRNA-135a-1-3p, miRNA-1982-5p<br>miRNA-196b-3p, miRNA-1898<br>↓ miRNA-346- 5p<br>Human:<br>↑ miRNA-193a-5p in PBMCs | ↑ plasma, liver and intestine triacylglycerol (mice)<br>mRNA microarrays:<br>↓ 332 genes including Cd36, Cyp4a10, Gsta3, Hsd3b2, Paqr7, Pdk4 and Slc35e3<br>↑ 342 genes including Car2, Crym, Cxcl13, Dusp6, Hsph1 and Il33<br><b>(Lipid metabolism and Anti-CVD)</b> |
| D'Amore, 2016 [25]       | EVOO (50 mL, 4h)<br>(High phenols: 491 mg/kg)<br>(Low phenols: 270 mg/Kg)                                                     | Human trial:<br>-Healthy subjects (n=12)<br>-MetS <sup>6</sup> subjects (n=12)                                                                                 | ↓ 8 miRNA:<br>miRNA-146b-5p, miRNA-19a-3p, miRNA-181b-5p, miRNA-107, miRNA-769-5p, miRNA-192-5p<br>↑ 6 miRNA:<br>miRNA-23b-3p, miRNA-519b-3p                                                                                                                                                        | ↓ glucose, insulin, HOMA-IR<br>↓ 1062 genes healthy<br>↑ 1376 genes healthy<br>↓ 551 genes MetS<br>↑ 403 genes MetS<br><b>(Anti-inflammatory, Anti-CVD and Anti-cancer)</b>                                                                                           |
| Xu, 2017[26]             | Oleuropein<br>(In vitro: 200 µM)<br>(In vivo:drinking water, 1% w/v)                                                          | In vitro:<br>-NPC <sup>7</sup> HNE1 and HONE1 cell lines<br>In vivo:<br>-xenograft NPC mouse model                                                             | ↑ 22 different miRNAs<br>↑ miRNA-519d                                                                                                                                                                                                                                                               | ↑ Radio-sensitivity<br>↓ mRNA and protein levels of HIF1α <sup>8</sup> , p53 and PDRG1 <sup>9</sup><br><b>(Anti-cancer)</b>                                                                                                                                           |
| D'Adamo, 2017 [27]       | Hydroxytyrosol<br>100 µM                                                                                                      | In vitro:<br>-Human primary and C-28/I2 chondrocytes                                                                                                           | ↓ Up-regulation of miRNA-9 induced by H <sub>2</sub> O <sub>2</sub>                                                                                                                                                                                                                                 | ↑ Down-regulation of SIRT-1 induced by H <sub>2</sub> O <sub>2</sub><br><b>(Anti-osteoarthritis and anti-oxidant)</b>                                                                                                                                                 |
| Bigagli, 2017 [28]       | Hydryxytyrosol, Oleuropein<br>(10 µM)                                                                                         | In vitro:<br>-RAW264.7 macrophage cells stimulated with LPS                                                                                                    | ↓ miRNA-146a                                                                                                                                                                                                                                                                                        | ↓ Oxidative burst<br>↓ NO and PGE2<br>↓ CD11b expression<br>↑ Nrf2 translocation                                                                                                                                                                                      |

|                       |                                                                                         |                                                                                                                                           |                                                                                                 |                                                                                                                                                                                                                                      |
|-----------------------|-----------------------------------------------------------------------------------------|-------------------------------------------------------------------------------------------------------------------------------------------|-------------------------------------------------------------------------------------------------|--------------------------------------------------------------------------------------------------------------------------------------------------------------------------------------------------------------------------------------|
|                       |                                                                                         |                                                                                                                                           |                                                                                                 | <b>(Anti-inflammatory)</b>                                                                                                                                                                                                           |
| Luceri, 2017 [29]     | EVOO<br>(10 g/100 g of diet)<br>(High phenols: 718.8 mg/kg)<br>(Low phenols: 9.3 mg/Kg) | In vivo:<br>-Middle-aged C57Bl/6J mice 6 months                                                                                           | ↑ miRNA-484, miRNA-27, miRNA-137, miRNA-30, miRNA-34, miRNA-124                                 | ↑ Motor and cognitive behavior<br>↑ Notch1, BMPs, NGFR<br>GLP1R, CRT3<br><b>(Anti-aging)</b>                                                                                                                                         |
| Xing, 2017 [30]       | Oleuropein<br>(In vitro: 200 μM)<br>(In vivo: drinking water, 1% w/v)                   | In vitro:<br>-Caov3 and Skov3 ovarian cancer cell lines<br>In vivo:<br>-xenograft ovarian cancer mouse model                              | ↑ 10 different miRNAs<br>↑ miRNA-299                                                            | ↑ Radio-sensitivity<br>↓ mRNA of HPSE1<br>↓ HIF1α<br><b>(Anti-cancer)</b>                                                                                                                                                            |
| Abtin, 2018 [31]      | Oleuropein<br>(600-1000 μg/mL)                                                          | In vitro:<br>-Human MCF-7 breast cancer cell line                                                                                         | ↓ miRNA-21, miRNA-155                                                                           | ↑ Apoptosis<br>↓ Viability, Migration<br>↑ APAF-1, PTEN, TP53INP-1, and FADD genes<br><b>(Anti-cancer)</b>                                                                                                                           |
| ArunSundar, 2018 [62] | Hydroxytyrosol<br>(In vitro: 100 μM)<br>(In vivo: not reported)                         | In vivo:<br>-Animal model: Alzheimer's Disease induced in mouse by oA42i <sup>10</sup><br>-Organotypic hippocampal slice cultures (OHSCs) | ↑ miRNA-124                                                                                     | ↑ Cognitive impulsivity<br>↓ Anxiety-like behavior<br>↓ HDAC6, HSP90<br><b>(Anti-Alzheimer's Disease)</b>                                                                                                                            |
| Nanda, 2019 [61]      | EVOO<br>(Thrice a week, 1 g/kg body weight, gavage)                                     | In vivo:<br>-Sprague Dawley rats exposed to DHM <sup>11</sup> (model of colon carcinogenesis)                                             | ↑ miRNA-143 and miRNA-145 expression<br>↓ Methylation of promoter region of miR-143 and miR-145 | ↑ body weights<br>↓ tumor or polyp incidence, multiplicity and size<br>↓ mRNA and protein expression of NF-κB, VEGF, MMP-9<br>↑ mRNA and protein expression of caspase-3 and caspase-9<br><b>(Anti-cancer and Anti-inflammatory)</b> |

|                                  |                                                                                            |                                                                                          |                                                                                                                                                     |                                                                                                                                                                                                                                                                                                          |
|----------------------------------|--------------------------------------------------------------------------------------------|------------------------------------------------------------------------------------------|-----------------------------------------------------------------------------------------------------------------------------------------------------|----------------------------------------------------------------------------------------------------------------------------------------------------------------------------------------------------------------------------------------------------------------------------------------------------------|
| Juli, 2019 [63]                  | Oleacein (3,4-DHPEA-EDA)<br>(2,5-10 $\mu$ M)                                               | In vitro:<br>-NCI-H929, RPMI-8226,<br>U266, MM1s and JJN3<br>MM <sup>12</sup> cell lines | $\uparrow$ miRNA-29b and miRNA-22<br>in JJN3                                                                                                        | $\downarrow$ Viability and clonogenicity of<br>MM cells<br>=viability of normal PBMC<br>$\downarrow$ Cell cycle progression<br>$\uparrow$ Apoptosis<br>$\downarrow$ Sp1 protein expression<br>$\uparrow$ in vitro anti-MM activity of<br>the proteasome inhibitor<br>carfilzomib<br><b>(Anti-cancer)</b> |
| Benincasa, 2019 [32]             | Hydroxytyrosol oleate<br>(5 $\mu$ M)                                                       | In vitro:<br>-HaCat human<br>immortalized keratinocyte<br>cell line                      | $\uparrow$ miRNA-34a, miRNA-21,<br>miRNA-29a                                                                                                        | $\uparrow$ Viability<br>$\downarrow$ Intracellular ROS formation<br>$\downarrow$ SOD and GST enzyme<br>activity<br>$\downarrow$ MDA<br><b>(Anti-oxidant)</b>                                                                                                                                             |
| Lopez De Las Hazas,<br>2019 [33] | Hydroxytyrosol<br>(0.03 % HT in the Diet)                                                  | In vivo:<br>-Mice liver samples<br>obtained from a previous<br>study [24]                | 247 different miRNAs<br>detected in mouse liver<br>samples<br>$\uparrow$ miRNA-802-5p, miRNA-30a-<br>5p, miRNA-146b-5p<br>$\downarrow$ miRNA-423-3p | Expression of several genes<br>and proteins<br>$\uparrow$ Fgf21 and Rora<br><b>(Lipid metabolism and Anti-<br/>CVD)</b>                                                                                                                                                                                  |
| Tezcan, 2019 [34]                | Oleuropein<br>(277.5 and 555 $\mu$ M)<br><br>Tested the effects in combination<br>with TMZ | In vitro:<br>-T98G human GBM cell line                                                   | $\uparrow$ miRNA-181b, miRNA-137<br>and Let-7d<br>=miRNA-153                                                                                        | $\downarrow$ Viability/proliferation<br><br><b>(Anti-cancer)</b>                                                                                                                                                                                                                                         |
| Scoditti, 2019 [35]              | Hydroxytyrosol<br>(1-10 $\mu$ M)                                                           | In vitro:<br>-Human SGBS <sup>13</sup> adipocytes<br>stimulated with TNF- $\alpha$       | $\downarrow$ upregulation of miRNA-34a,<br>miRNA-155 induced by TNF- $\alpha$<br>$\uparrow$ let-7c expression level<br>decreased by TNF- $\alpha$   | $\downarrow$ TNF- $\alpha$ induced upregulation<br>of mRNA of: MCP-1, CXCL-10,<br>M-CSF, IL-1, VEGF, COX-2,<br>MMP-2, IL-6, PAI-1, ICAM-1,<br>SOD-1, GPX-1<br>$\uparrow$ TNF- $\alpha$ induced<br>downregulation of mRNA of:<br>eNOS, PGC-1 $\alpha$ , GLUT-4.                                           |

|                     |                                                                        |                                                                                                                            |                                                                                                       |                                                                                                                                                                                                                                                                                                        |
|---------------------|------------------------------------------------------------------------|----------------------------------------------------------------------------------------------------------------------------|-------------------------------------------------------------------------------------------------------|--------------------------------------------------------------------------------------------------------------------------------------------------------------------------------------------------------------------------------------------------------------------------------------------------------|
|                     |                                                                        |                                                                                                                            |                                                                                                       | ↓ NFκB activation<br><b>(Anti-inflammatory)</b>                                                                                                                                                                                                                                                        |
| D'Adamo, 2019 [36]  | Hydroxytyrosol<br>(100 μM)                                             | In vitro:<br>-Human primary and C-28/12 chondrocytes                                                                       | Restores the methylation of promoters of miRNA-9 decreased by H <sub>2</sub> O <sub>2</sub>           | <b>(Anti-osteoarthritis and anti-oxidant)</b>                                                                                                                                                                                                                                                          |
| Carpi, 2019 [37]    | Oleocanthal ( <i>p</i> -DHPEA-EDA)<br>Oleacein (3,4-DHPEA-EDA)<br>25μM | In vitro:<br>-Human SGBS adipocytes stimulated with TNF-α                                                                  | Counteract the TNF-α effects in cells and exosomes:<br>↓ miRNA-34a-5p and miRNA-155-5p<br>↑ let-7c-5p | =Cell viability<br>↓ TNF-α induced upregulation of mRNA of: IL-1β, COX-2, VEGF/KDR, MMP-2, NADPH oxidase, SOD, GPX, MCP-1, CXCL-10, MCS-F<br>↑ expression of the anti-inflammatory/metabolic effector PPAR<br>↓ NFκB activation<br><b>(Anti-inflammatory)</b>                                          |
| Terzuoli, 2020 [38] | Hydroxytyrosol-3-O-sulphate (major HT plasma metabolite, 10 μM)        | In vitro:<br>-Human umbilical endothelial cells (HUVEC)<br>-Human retinal endothelial cells (HREC) (stimulated with IL-1β) | ↑ let-7 miRNA decreased by IL-1β                                                                      | ↓ IL-1β induced endothelial-to-mesenchymal transition (EndMT)<br>↑ CD31, FGFR1 (protein)<br>↓ α-SMA, vimentin (protein)<br>↓ TGF-β signaling<br>↓ nuclear translocation of SMAD2/3<br>↓ ACTA2, ZEB2, SNAI1, VIM, NOTCH3, CNN1, MMP2, MMP9 (mRNA)<br>↑ CD31, FGFR1 (mRNA)<br><b>(Anti-inflammatory)</b> |

<sup>1</sup> Temozolomide, <sup>2</sup> Glioblastoma multiforme, <sup>3</sup> Extra virgin olive oil, <sup>4</sup> Type 1 cannabinoid receptor, <sup>5</sup> Human primary epithelial intestinal cells, <sup>6</sup> Metabolic syndrome, <sup>7</sup> Nasopharyngeal carcinoma, <sup>8</sup> Hypoxia-inducible factor-1α, <sup>9</sup> DNA damage-regulated protein, <sup>10</sup> Soluble oligomeric amyloid β<sub>1-42</sub> plus ibotenic acid, <sup>11</sup> 1,2-dimethylhydrazine, <sup>12</sup> Multiple myeloma, <sup>13</sup> Simpson-Golabi-Behmel syndrome.

**Table S2.** Characteristics of selected studies showing the effects of olive oil and/or its phenolic compounds on DNA methylation

| Ref.                        | Compound (dose)                                                                                                                                                                    | Model                                                                                                                           | Epigenetic Effects                                                                                                                                                                        | Other effects<br>Health related effects                                                                                                            |
|-----------------------------|------------------------------------------------------------------------------------------------------------------------------------------------------------------------------------|---------------------------------------------------------------------------------------------------------------------------------|-------------------------------------------------------------------------------------------------------------------------------------------------------------------------------------------|----------------------------------------------------------------------------------------------------------------------------------------------------|
| Hoile, 2014 [39]            | -Olive oil<br>(4 g daily, "1 g capsules")<br>-n-3 LC-PUFA                                                                                                                          | Human trial:<br>-29 Chronic kidney disease patients, 8 weeks<br>-Peripheral blood mononuclear cells                             | DNA methylation of CpGs in 5' regulatory regions of:<br>↑FADS2<br>= FADS1, ELOVL2<br>↑ELOVL5 in some regions and ↓in others                                                               | ↓mRNA of: <i>FADS2</i> , <i>FADS1</i> , <i>ELOVL5</i> (only female), <i>ELOVL2</i><br><br><b>(PUFA metabolism)</b>                                 |
| Rodríguez-Miguel, 2015 [58] | -Low fat<br>-Corn oil (CO)<br>-EVOO <sup>1</sup><br>(17% in the diet)                                                                                                              | In vivo:<br>-DMBA <sup>2</sup> -Induced Breast Cancer in rats                                                                   | ↑Global DNA methylation<br>↓promoter methylation of <i>RASSF1A</i> and <i>TIMP3</i> vs. CO<br>↓mRNA of <i>DNMT1</i> , <i>DNMT3a</i> , <i>DNMT3b</i> vs. CO<br>↓DNMT activity vs. CO       | Weak tumor enhancing effect<br>↓mRNA of: <i>RASSF1A</i> , <i>TIMP3</i> ,<br><b>(Anti-cancer)</b>                                                   |
| Di Francesco, 2015 [60]     | -ROO <sup>3</sup><br>-EVOO<br>(In vitro: 100 ppm containing 320 mg of total phenols/kg)<br>(In vivo: gavage, 250 µl/300 g)<br>-OPE <sup>4</sup> (50 µM)<br>-Hydroxytyrosol (50 µM) | In vitro:<br>-CaCo-2 human colorectal cancer cells<br>In vivo:<br>-Female Sprague-Dawley rats (Single dose and 10 days of EVOO) | <i>CNR1</i> gene promoter DNA methylation:<br>=ROO<br>↓EVOO (in vitro and in vivo)<br>↓OPE<br>↓HT                                                                                         | CB1 <sup>5</sup> (mRNA and protein expression):<br>↑EVOO (in vitro and in vivo)<br>↑OPE<br>↑HT<br>↓Proliferation (OPE, HT)<br><b>(Anti-cancer)</b> |
| Liao, 2015 [40]             | Fish oil (FO as control)<br>Olive oil<br>(80 g/kg of diet)                                                                                                                         | In vivo:<br>-Yellow croakers ( <i>Larimichthys crocea</i> )<br>70 days                                                          | Mitochondrial DNA methylation<br>↑ <i>TR</i> and <i>ND4L</i><br>↓ <i>RNR1</i><br>= <i>D-loop</i><br>mRNA and protein:<br>↓ <i>DNMT1</i> , <i>DNMT3B</i><br>↑ <i>DNMT3A</i> , <i>HIF1a</i> | ↑Liver lipid<br>↑Hydroxyl radical scavenging activity<br><b>(Anti-oxidant)</b>                                                                     |

|                           |                                                                                                                                  |                                                                                                                    |                                                                                                             |                                                                                                                                                            |
|---------------------------|----------------------------------------------------------------------------------------------------------------------------------|--------------------------------------------------------------------------------------------------------------------|-------------------------------------------------------------------------------------------------------------|------------------------------------------------------------------------------------------------------------------------------------------------------------|
| Govindarajah, 2016 [41]   | Butter fat<br>Safflower oil<br>Olive oil<br>(40% fat from olive oil)                                                             | In vivo:<br>-DMBA-Induced Breast Cancer<br>in rats<br>(prenatal exposure, cancer in<br>prepubertal mammary glands) | ↑ mRNA expression of<br><i>DNMT3a, Mbd1</i>                                                                 | =Tumor volume, latency,<br>multiplicity<br>↓mRNA of: <i>Lrrn1, Nf1, Dbf4,</i><br><i>Cadm4,</i><br>↑mRNA of: <i>Tmem45b, Btn1a1</i><br><b>(Anti-cancer)</b> |
| Garcia-Escobar, 2017 [42] | Coconut oil (CO)<br>Sunflower oil (SO)<br>Olive oil<br>(10% fat from oils)                                                       | In vivo:<br>-Sprague-Dawley rats<br>-Adipocytes                                                                    | TNFα promoter methylation<br>↓ versus SO<br>↑ versus CO                                                     | ↓mRNA of TNFα versus CO<br>↓release of TNFα from<br>adipocytes versus CO<br><b>(Anti-inflammatory)</b>                                                     |
| Monastero, 2017 [43]      | Coconut oil (CO)<br>Sunflower oil (SO)<br>Olive oil<br>(10% fat from oils)                                                       | In vivo:<br>-Sprague–Dawley rats                                                                                   | ↑VEGF promoter methylation<br>versus CO                                                                     | ↓ mRNA and protein of<br>VEGFB versus CO<br><b>(Anti-obesity)</b>                                                                                          |
| Tezcan, 2017 [44]         | <i>Olea europaea</i> leaf extract:<br>OLE (5-2000 µg/ml, 15%<br>oleuropein)<br><br>Tested the effects in<br>combination with TMZ | In vitro:<br>-Human primary GBM <sup>6</sup> tumor<br>cells                                                        | ↑ MGMT promoter<br>methylation                                                                              | ↓Proliferation (with TMZ)<br>↑DNA damage (with TMZ)<br>↓p53 (protein)<br><b>(Anti-cancer)</b>                                                              |
| Arpón, 2018 [45]          | MedDiet + EVOO (39.6-66.4<br>g/day)<br>MedDiet + nuts (MN)<br>Low fat (RF)                                                       | Human trial:<br>-36 subjects, 5 years<br>-Peripheral white blood cells                                             | 223 CpGs screened<br>↓ DNA methylation of<br>cg17071192–GNAS/GNASAS<br>versus both MN and RF                | ↓Diabetes<br>↓Hypercholesterolemia<br>↓Arterial hypertension<br><b>(Anti-CVD)</b>                                                                          |
| Corominas-Faja, 2018 [46] | Oleacein (3,4-DHPEA-EDA)<br>(0,1-20 µM)                                                                                          | In vitro:<br>-SUM-159 Breast Cancer<br>cells (CSC)<br>-MCF-7<br>In vivo:                                           | ↓DNMT1, 3A/3L and<br>3B/3L enzyme activity in nuclear<br>extract<br><br>Act as SAM competitive<br>inhibitor | Antistemness properties:<br>↓ALDH <sup>+</sup> cells<br>↓mammospheres formation<br>↓ tumorigenicity in vivo<br>↓mTOR activity<br>↓44 genes                 |

|                             |                                                     |                                                                                                 |                                                                                                                                                                                                                 |                                                                                                                                                                                                                                                                                                    |
|-----------------------------|-----------------------------------------------------|-------------------------------------------------------------------------------------------------|-----------------------------------------------------------------------------------------------------------------------------------------------------------------------------------------------------------------|----------------------------------------------------------------------------------------------------------------------------------------------------------------------------------------------------------------------------------------------------------------------------------------------------|
|                             |                                                     | -Tumor xenograft and orthotopic transplant studies                                              |                                                                                                                                                                                                                 | ↑116 genes<br><b>(Anti-cancer)</b>                                                                                                                                                                                                                                                                 |
| Hunter, 2019 [47]           | -EVOO<br>(6 g daily, “capsules”)<br>-n-3 PUFA       | Human trial:<br>-8 subjects (trained male cyclists), 4 weeks<br>-Whole blood isolated from      | =Global DNA methylation<br>=mRNA expression of <i>DNMT3a</i> , <i>DNMT3b</i><br>↓mRNA expression of <i>DNMT1</i><br>=Methylation of <i>PPARGC1A</i><br>↓Methylation of <i>IL6</i><br>=Methylation of <i>TNF</i> | =mRNA expression of <i>IL6</i> , <i>TNF</i> , <i>PPARGC1A</i><br><br><b>(Anti-inflammatory)</b>                                                                                                                                                                                                    |
| Nanda, 2019 [61]            | EVOO<br>(Thrice a week, 1 g/kg body weight, gavage) | In vivo:<br>-Sprague Dawley rats exposed to DHM <sup>7</sup> (model of colon carcinogenesis)    | ↑methylation of promoter region of NF-κB, VEGF, MMP-9,<br>↓methylation promoter region of miR-143, miR-145, caspase-3, caspase-9                                                                                | ↑body weights<br>↓tumor or polyp incidence, multiplicity and size<br>↓mRNA and protein expression of NF-κB, VEGF, MMP-9<br>↑mRNA and protein expression of caspase-3 and caspase-9<br><b>(Anti-cancer and Anti-inflammatory)</b>                                                                   |
| Garcia-Contreras, 2019 [48] | Hydroxytyrosol<br>(1.5 mg/kg of feed per day)       | In vivo:<br>-Sows (maternal supplementation), 65 days<br>-Blood and plasma (maternal and fetal) | ↑Global DNA methylation of fetus                                                                                                                                                                                | Undetectable Plasma hydroxytyrosol concentrations<br>↑total antioxidant capacity (TEAC)<br>↓ body and visceral weights<br>↑ diameter of the descending aorta;<br>↓ Parameters for glycemic index (glucose, fructosamine) and lipid profile<br>=SOD1, CAT, HIF1A, VEGFA, NOS2, IGF1 and UCP2 (mRNA) |



|                    |                                                                                    |                                                                                   |                                                                                                |                                                                                                                                                                                                                                          |
|--------------------|------------------------------------------------------------------------------------|-----------------------------------------------------------------------------------|------------------------------------------------------------------------------------------------|------------------------------------------------------------------------------------------------------------------------------------------------------------------------------------------------------------------------------------------|
|                    |                                                                                    |                                                                                   |                                                                                                | <b>(Anti-intrauterine growth restriction)</b>                                                                                                                                                                                            |
| Juli, 2019 [63]    | Oleacein (3,4-DHPEA-EDA) (2,5-10 µM)                                               | In vitro:<br>-NCI-H929, RPMI-8226, U266, MM1s and JJN3 MM <sup>8</sup> cell lines | =Global DNA methylation<br>=mRNA and protein expression of: DNMT1, DNMT3A, DNMT3B              | ↓Viability and clonogenicity of MM cells<br>=viability of normal PBMC<br>↓Cell cycle progression<br>↑Apoptosis<br>↓ Sp1 protein expression<br>↑in vitro anti-MM activity of the proteasome inhibitor carfilzomib<br><b>(Anti-cancer)</b> |
| Bordoni, 2019 [59] | -EVOO (volumes dissolved in DMSO not reported)<br>- <i>Nigella sativa</i> oil (NG) | In vitro:<br>-THP-1 (stimulated with PMA and LPS)                                 | ↓mRNA of DNMT3A, DNMT3B<br>=DNMT1<br>↑Global DNA methylation versus NG<br>↓TET2<br>=TET1, TET3 | =Cell viability<br>↓IL-6<br>↓IL-1β<br>↓MCP-1<br>↓MtDNA copy number<br>↓Membrane fluidity<br>= (GSH/GSSG) Ratio<br><b>(Anti-inflammatory)</b>                                                                                             |

<sup>1</sup>Extra virgin olive oil, <sup>2</sup>Dimethylbenz(a)anthracene, <sup>3</sup>Rectified olive oil, <sup>4</sup>Olive oil phenolic extract, <sup>5</sup>Type 1 cannabinoid receptor, <sup>6</sup>Glioblastoma multiforme, <sup>7</sup>1,2-dimethylhydrazine, <sup>8</sup>Multiple myeloma

**Table 3.** Characteristics of selected studies showing the effects of olive oil and/or its phenolic compounds on Histone modifications

| Ref.                        | Compound (dose)                                                                                         | Model                                                                                       | Epigenetic Effects                                                                                                    | Other effects<br>Health related effects                                                                                                                                                                                                                        |
|-----------------------------|---------------------------------------------------------------------------------------------------------|---------------------------------------------------------------------------------------------|-----------------------------------------------------------------------------------------------------------------------|----------------------------------------------------------------------------------------------------------------------------------------------------------------------------------------------------------------------------------------------------------------|
| Oliveras-Ferraro, 2011 [49] | -EVOO <sup>1</sup> phenolic extract from 14 monovarietals (0%, 0.0001, 0.001, 0.01, 0.05 and 0.1 % v/v) | In vitro:<br>-JIMT-1 human breast cancer cell line                                          | ↑Acetylation of Histone H3 at Lysine 18                                                                               | ↓Cell viability<br>↓Cell cycle (arrest at the G2/M phase)<br>= AKT<br>↑Stat3<br>↑p38MAPK<br>↑MEK1<br>↑NF-κB phosphorylation status<br><b>(Anti-cancer)</b>                                                                                                     |
| Rodríguez-Miguel, 2015 [58] | -Low fat<br>-Corn oil (CO)<br>-EVOO<br>(17% in the diet)                                                | In vivo:<br>-DMBA <sup>2</sup> -Induced Breast Cancer in rats                               | ↓H4K20me3 in tumor tissue<br>↓H4K16ac in normal and tumor tissue<br>= H3K4me2 and H3K27me3 in normal and tumor tissue | Weak tumor enhancing effect<br>↓mRNA of: <i>RASSF1A</i> , <i>TIMP3</i> ,<br><b>(Anti-cancer)</b>                                                                                                                                                               |
| Luccarini, 2015 [50]        | -Oleuropein aglicone (OLE, 100μM)<br>-OLE diet (50 mg/kg of diet)                                       | In vivo:<br>-TgCRND8 <sup>3</sup> AD mouse model<br>In vitro:<br>-pE3-Aβ <sup>4</sup> + OLE | ↑H3K9 and H4K5 acetylation<br>↓HDAC2 expression                                                                       | pE3-Aβ aggregation modified<br>↓pE3-Aβ cytotoxicity<br>↓Glutaminyl cyclase (QC)<br>↑Autophagy<br>↓ dysfunctions of transgene-induced long-term potentiation(LTP) in the hippocampal area<br>↑OLE metabolites in the brain<br><b>(Anti-Alzheimer's Disease)</b> |
| Bonvino, 2015 [51]          | -Hydroxytyrosol (0-100μM)                                                                               | In vitro:                                                                                   | ↑HDAC6<br>↓KDM1A (LSD1)                                                                                               | = acetylated α tubulin                                                                                                                                                                                                                                         |

|                       |                                                                                                                                                         |                                                                                                                                          |                                                        |                                                                                                  |
|-----------------------|---------------------------------------------------------------------------------------------------------------------------------------------------------|------------------------------------------------------------------------------------------------------------------------------------------|--------------------------------------------------------|--------------------------------------------------------------------------------------------------|
|                       | A commercial topical antimicrobial spray containing the Olivamine 10 <sup>®</sup> formulation, which includes a hydroxytyrosol containing olive extract | -purified enzyme LSD1 + hydroxytyrosol<br>Ex vivo:<br>-Tissue sections obtained from the peri wound of a diabetic ulcer patient          |                                                        | <b>(Anti diabetes adverse effects)</b>                                                           |
| ArunSundar, 2018 [62] | Hydroxytyrosol<br>(In vitro: 100 μM)<br>(In vivo: not reported)                                                                                         | In vivo:<br>-Animal model: Alzheimer's Disease induced in mouse by oA42i <sup>5</sup><br>-Organotypic hippocampal slice cultures (OHSCs) | ↓ HDAC6                                                | ↓Cognitive impulsivity<br>↓Anxiety-like behavior<br>↓ HSP90<br><b>(Anti-Alzheimer's Disease)</b> |
| Acevedo, 2019 [52]    | -Olive oil in the diet                                                                                                                                  | In vivo:<br>-Human Placenta (ALADDIN <sup>6</sup> cohort)<br>Cross-sectional study                                                       | ↑H3 acetylation at FOXP3, IL10RA and IL7R promoters    | <b>(Immune system)</b>                                                                           |
| Verdura, 2019 [53]    | -Oleacein (Decarboxymethyl oleuropein aglycone (DOA) (3,4-DHPEA-EDA) (0.01-100μM)                                                                       | In vitro:<br>-purified enzyme IDH1 + oleacein<br>-MCF10/HCT116 cells expressing R132H IDH1 mutant and their parental cell lines          | ↓ (H3K9me3)                                            | ↓ R132H IDH1<br>↓ 2HG<br>↑PD-L1<br>↓colony formation<br><b>(Anti-cancer)</b>                     |
| Bayat, 2019 [54]      | -Oleuropein glucoside (150-2400μg/ml)                                                                                                                   | In vitro:<br>MCF7 human breast cancer cell line                                                                                          | ↓HDAC2 e HDAC3 mRNA expression                         | ↓cell viability<br>↑ cell apoptosis<br>↓cell migration<br><b>(Anti-cancer)</b>                   |
| Juli, 2019 [63]       | -Oleacein (3,4-DHPEA-EDA) (2,5-10 μM)                                                                                                                   | In vitro:                                                                                                                                | ↑ H3 and H4 acetylation<br>↓I/II HDACs (HDAC1/2/3/4/6) | ↓Viability and clonogenicity of MM cells<br>=viability of normal PBMC                            |

|                     |                                                                                                             |                                                                                                |                  |                                                                                                                                                                 |
|---------------------|-------------------------------------------------------------------------------------------------------------|------------------------------------------------------------------------------------------------|------------------|-----------------------------------------------------------------------------------------------------------------------------------------------------------------|
|                     |                                                                                                             | -NCI-H929, RPMI-8226, U266, MM1s and JJN3 MM <sup>7</sup> cell lines                           | =HDAC activity   | ↓Cell cycle progression<br>↑Apoptosis<br>↓ Sp1 protein expression<br>↑in vitro anti-MM activity of the proteasome inhibitor carfilzomib<br><b>(Anti-cancer)</b> |
| Cuyàs, 2019 [55]    | -Oleacein (3,4-DHPEA-EDA) (0,01-100µM)                                                                      | In vitro:<br>- Purified enzyme (KDM1A) + oleacein<br>-BT-474 and MCF7 breast cancer cell lines | ↓KDM1A (LSD1)    | ↓SOX2<br><b>(Anti-cancer)</b>                                                                                                                                   |
| Cuyas, 2019 [56]    | -Oleacein (3,4-DHPEA-EDA) (1-100µM)                                                                         | In vitro:<br>-Purified enzyme + oleacein<br>-MCF-7 and BT-474 breast cancer cell lines         | ↓KDM6A<br>↓DOT1L | ↓NNMT<br>↓ACLY<br><b>(Anti-cancer)</b>                                                                                                                          |
| Mansouri, 2019 [57] | -Oleuropein glucoside 150-2400µg/ml                                                                         | In vitro:<br>-MCF-7 breast cancer cell line                                                    | ↓mRNA HDAC4      | ↓cell Viability<br>↑ cell apoptosis<br>↓ cell migration<br><b>(Anti-cancer)</b>                                                                                 |
| Bordoni, 2019 [59]  | -EVOO (volumes dissolved in DMSO not reported)<br>- <i>Nigella sativa</i> oil (NG)<br><br><u>No phenols</u> | In vitro:<br>-THP-1 (stimulated with PMA and LPS)                                              | ↓HDAC1, HDAC3    | =cell viability<br>↓IL-6<br>↓IL-1β<br>↓MCP-1<br>↓MtDNA copy number<br>↓Membrane fluidity<br>= (GSH/GSSG) Ratio<br><b>(Anti-inflammatory)</b>                    |

<sup>1</sup>Extra virgin olive oil, <sup>2</sup>Dimethylbenz(a)anthracene, <sup>3</sup>Transgenic hemizygous CRND8 mice; <sup>4</sup>pE3-Aβ pyroglutamate-amyloid-β; <sup>5</sup>oligomeric amyloid β<sub>1-42</sub> plus ibotenic acid; <sup>6</sup>Assessment of Lifestyle and Allergic Disease During INfancy (ALADDIN) cohort; <sup>7</sup>Multiple myeloma
